# Supplementary material for: SBT (Composed of Panax ginseng and Aconitum carmichaeli) and Stigmasterol Enhances Nitric Oxide Production and Exerts Curative Properties as a Potential Anti-Oxidant and Immunity-Enhancing Agent
Source: MDPI journal article supplement (doi:10.3390/antiox11020199), 2022-01-20
Supplement: s1 [file s1]

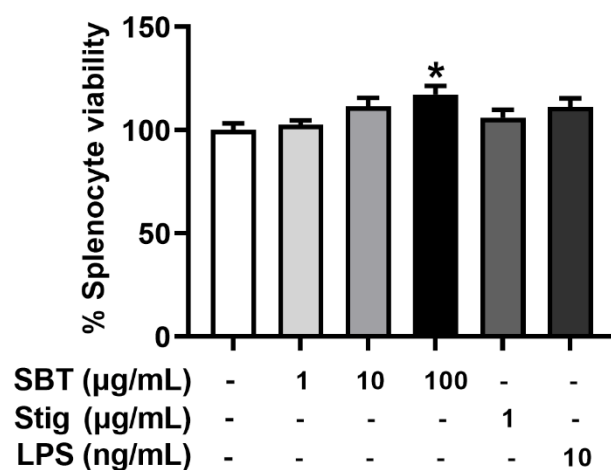

**Figure S1.** Neither SBT nor Stig has splenocyte toxicity. Splenocyte viability was determined by an MTT assay after the treatment with SBT, Stig, or LPS for 24 h. \* $p < 0.05$  vs untreated group.

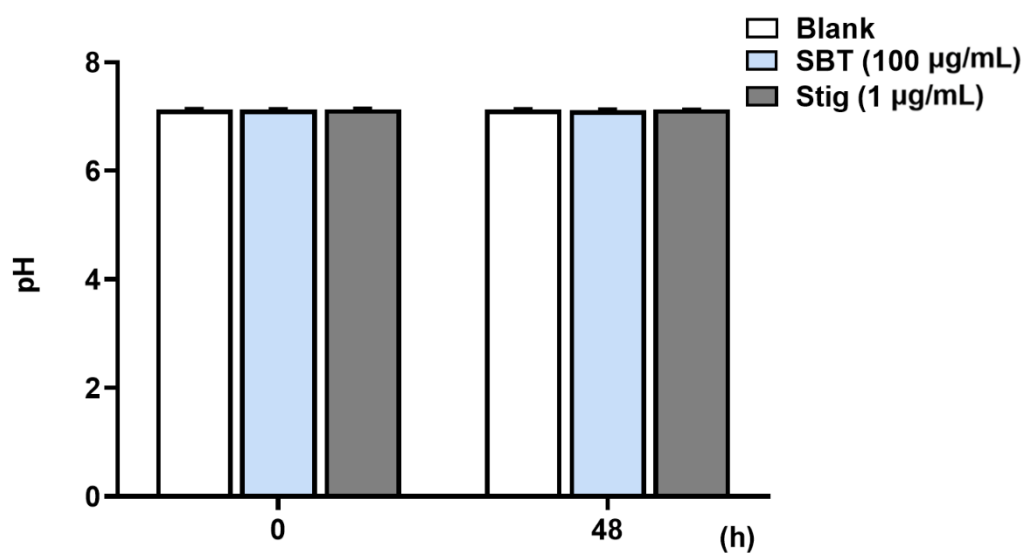

**Figure S2.** SBT or Stig does not affect pH of culture medium. The pH values were measured after treatment of SBT or Stig in culture medium at 37 °C for 48 h.

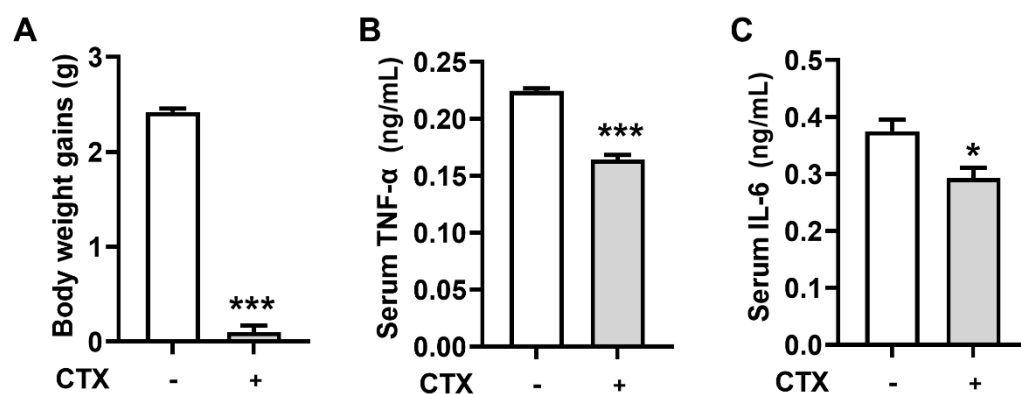

**Figure S3.** CTX leads to immunosuppression. From days 1–3, mice were intraperitoneally injected with CTX at 100 mg/kg per day except the normal group. From day 4 to day 10, both the normal group and the

CTX group were gavaged daily with PBS. (A) The body weight was analyzed as described in Materials and methods. (B, C) Each concentration in the serum was determined by ELISA. \* $p < 0.05$  and \*\*\* $p < 0.001$  vs the normal group. .
